# Supplementary material
Source: PubMed Central journal article supplement (PMC4241873)
Supplement: Supp_Figure1.pdf [file Supp_Figure1.pdf]

## Supplementary Data

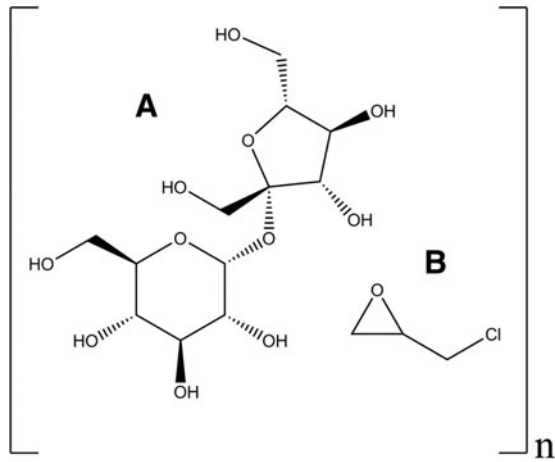

**SUPPLEMENTARY FIG. S1.** The chemical structure of Ficoll<sup>®</sup>. Ficoll is a co-polymer of (A) sucrose, which is a disaccharide composed of glucose and fructose; and (B) epichlorhydrin, which serves as a cross-linker.
