# Supplementary material
Source: PubMed Central journal article supplement (PMC4241873)
Supplement: Supp_Figure2.pdf [file Supp_Figure2.pdf]

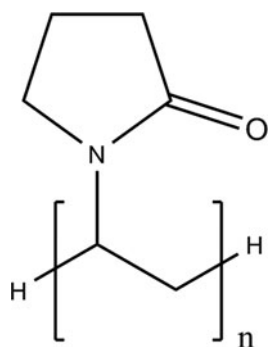

**SUPPLEMENTARY FIG. S2.** The chemical structure of polyvinylpyrrolidone (PVP). PVP is a water-soluble polymer that is made from the monomer *N*-vinylpyrrolidone.
