# Supplementary material
Source: PubMed Central journal article supplement (PMC4241873)
Supplement: Supp_Figure3-5.pdf [file Supp_Figure3-5.pdf]

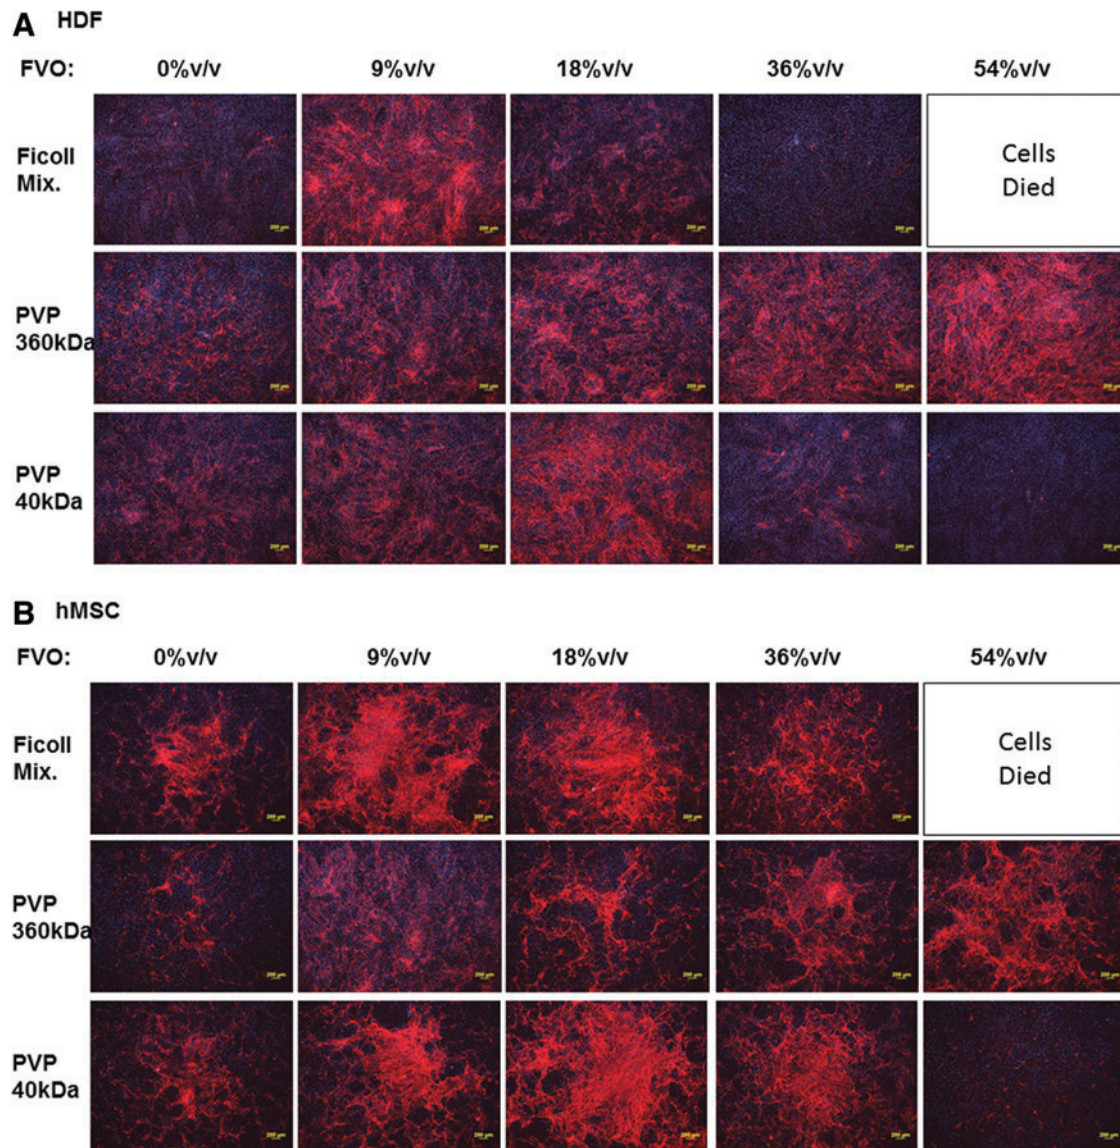

**SUPPLEMENTARY FIG. S3.** Day 6 effect of fractional volume occupancy (FVO) 0% v/v, 9% v/v, 18% v/v, 36% v/v, and 54% v/v of Ficoll mixture, PVP 360 kDa, and PVP 40 kDa on collagen I deposition of (A) human dermal fibroblast (HDF) and (B) human mesenchymal stem cell (hMSC). Cell nuclei are counterstained using 4',6-diamidino-2-phenylindolylactate (DAPI).

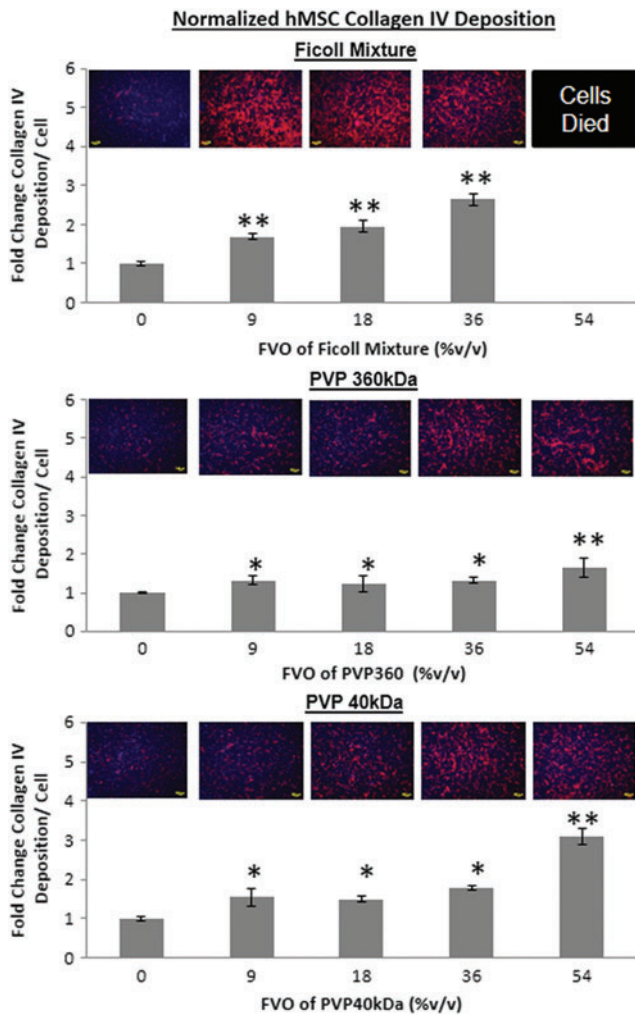

**SUPPLEMENTARY FIG. S4.** The effect of FVOs from 0% v/v to 54% v/v of the Ficoll mixture, PVP 360 kDa, and PVP 40 kDa on collagen IV deposition. \* $p < 0.05$ , \*\* $p < 0.01$  versus controls. Data are expressed as mean  $\pm$  SD, calculated from triplicates. Corresponding immunocytochemistry (ICC) images show collagen I deposition counterstained with DAPI for cell nuclei.

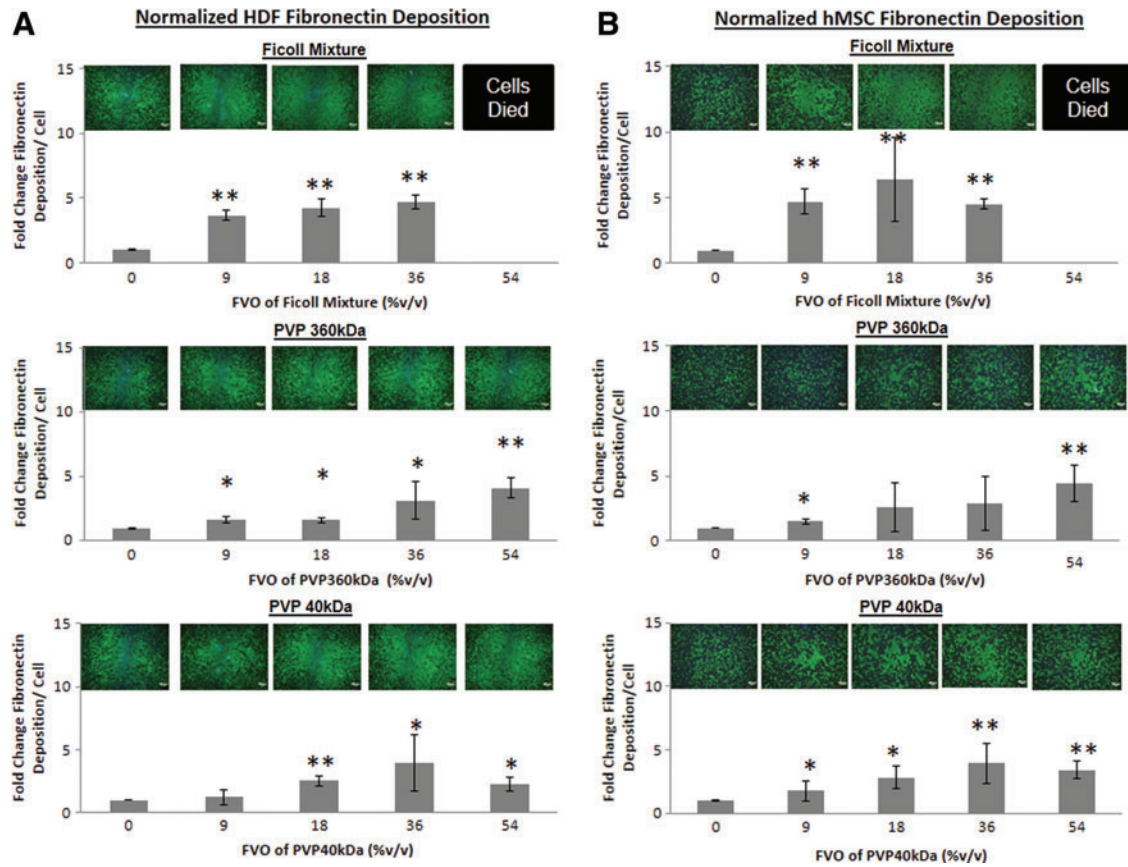

**SUPPLEMENTARY FIG. S5.** The effect of FVOs from 0% v/v to 54% v/v of the Ficolil mixture, PVP 360 kDa, and PVP 40 kDa on fibronectin deposition by (A) human dermal fibroblasts (HDF) and (B) human mesenchymal stem cells (hMSC). \* $p < 0.05$ , \*\* $p < 0.01$  versus controls. Data are expressed as mean  $\pm$  SD, calculated from triplicates. Corresponding ICC images show fibronectin deposition counterstained with DAPI for cell nuclei.
