# Supplementary material
Source: PubMed Central journal article supplement (PMC4241873)
Supplement: Supp_Figure3.pdf [file Supp_Figure3.pdf]

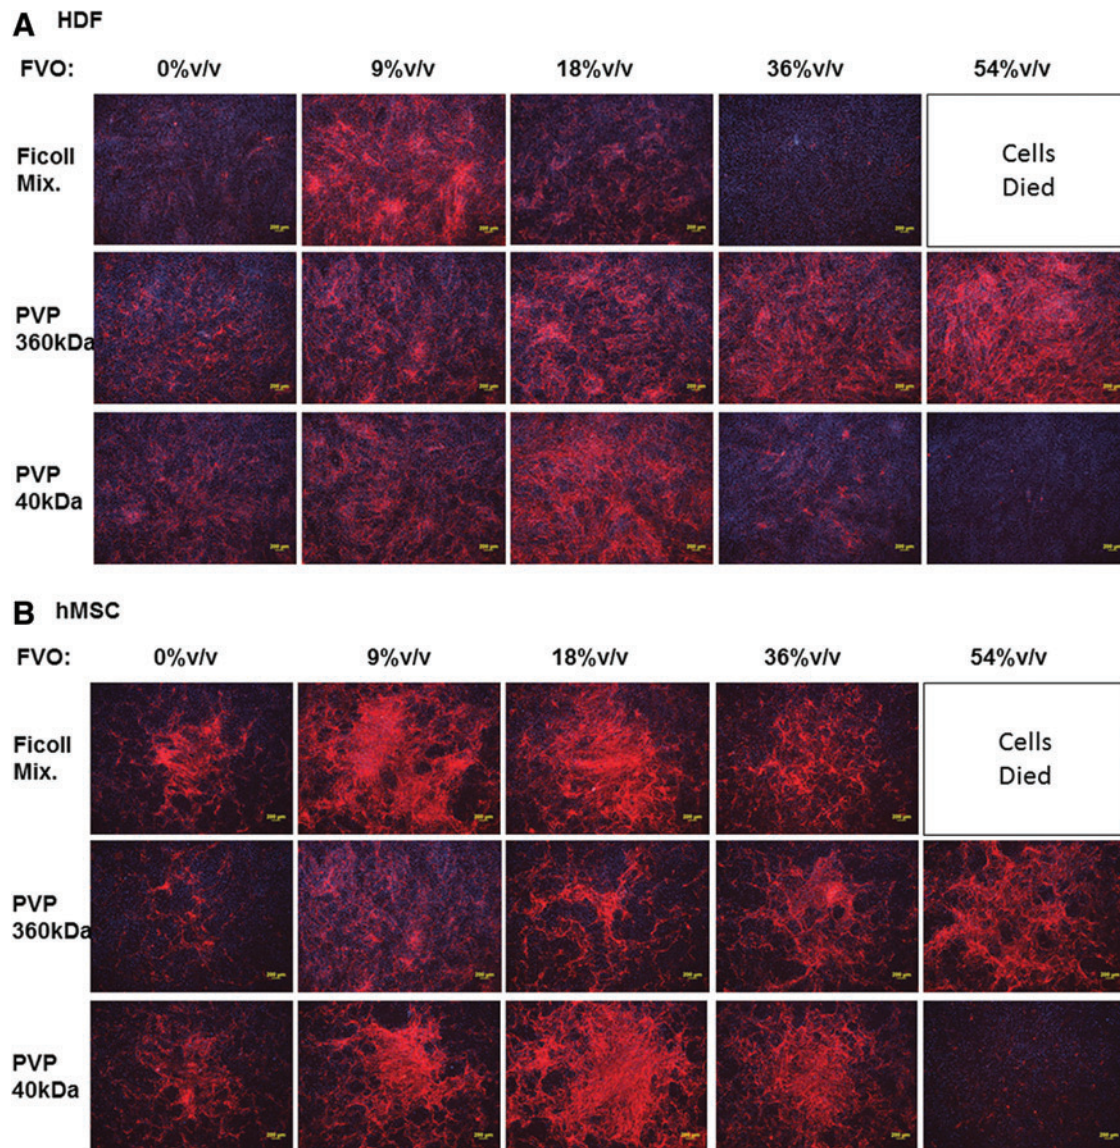

**SUPPLEMENTARY FIG. S3.** Day 6 effect of fractional volume occupancy (FVO) 0% v/v, 9% v/v, 18% v/v, 36% v/v, and 54% v/v of Ficoll mixture, PVP 360 kDa, and PVP 40 kDa on collagen I deposition of (A) human dermal fibroblast (HDF) and (B) human mesenchymal stem cell (hMSC). Cell nuclei are counterstained using 4',6-diamidino-2-phenylindole (DAPI).
