# Supplementary material
Source: PubMed Central journal article supplement (PMC4241873)
Supplement: Supp_Figure4.pdf [file Supp_Figure4.pdf]

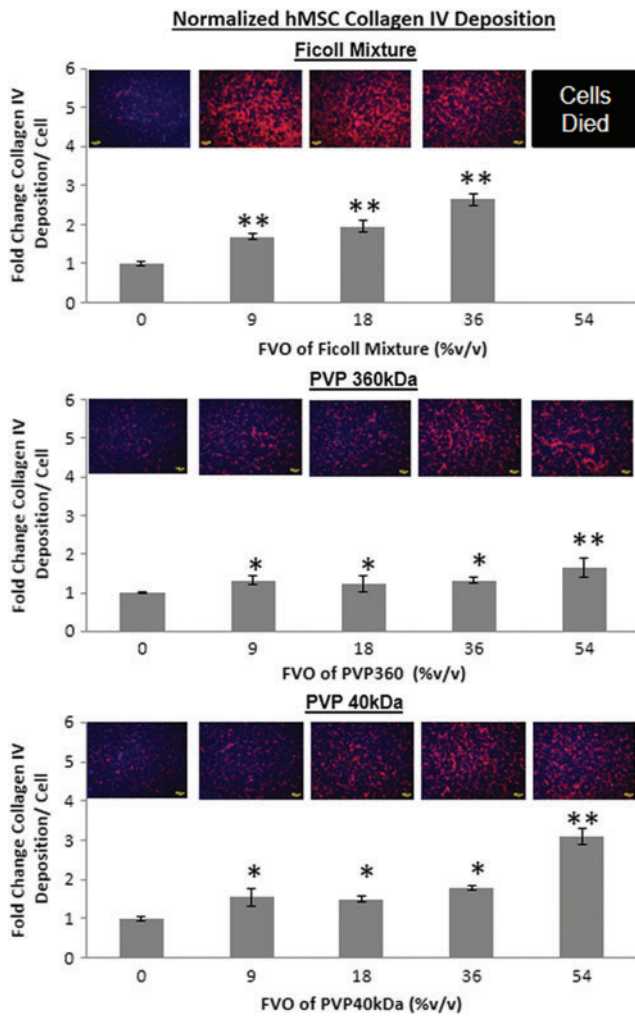

**SUPPLEMENTARY FIG. S4.** The effect of FVOs from 0% v/v to 54% v/v of the Ficolin mixture, PVP 360 kDa, and PVP 40 kDa on collagen IV deposition. \* $p < 0.05$ , \*\* $p < 0.01$  versus controls. Data are expressed as mean  $\pm$  SD, calculated from triplicates. Corresponding immunocytochemistry (ICC) images show collagen I deposition counterstained with DAPI for cell nuclei.
