# Supplementary material
Source: PubMed Central journal article supplement (PMC4241873)
Supplement: Supp_Table2.pdf [file Supp_Table2.pdf]

SUPPLEMENTARY TABLE S2. READINGS OBTAINED  
FROM MEASUREMENTS ON SOLUTIONS  
OF CROWDER (PVP40, PVP360, AND Fc MIX)  
ALONE TAKEN OVER A 2-H PERIOD

| <i>Crowder</i> | <i>Absorbance (arbitrary units)</i> |
|----------------|-------------------------------------|
| PVP40          | $0.387 \pm 0.005$                   |
| PVP360         | $0.077 \pm 0.001$                   |
| Fc mix         | $0.083 \pm 0.002$                   |

PVP, polyvinylpyrrolidone.
